# Supplementary material for: Thermal [2 + 2]-cycloaddition between silylalkynes and allenylphenols followed by the nucleophilic addition of water: metal-free and economical synthesis of arylcyclobutenals
Source: Royal Society of Chemistry journal article supplement (doi:10.1039/c9gc04184b), 2020-01-01
Supplement: c9gc04184b1.pdf [file c9gc04184b1.pdf]

*Supporting information 2*

**Thermal [2+2]-Cycloaddition between Silyl Alkynes and Allenyl Phenols  
followed by Nucleophilic Addition of Water; Metal-Free and Economical  
Synthesis of Arylcyclobutenals**

Shohei Ohno<sup>#</sup>, Ramon Francisco Avena <sup>#</sup>, Hiroshi Aoyama, Hiromichi Fujioka, and  
Mitsuhiro Arisawa\*

Graduate School of Pharmaceutical Sciences, Osaka University, Yamada-oka 1-6, Suita,  
Osaka, 565-0871

<sup>#</sup> S. O. and R. F. A. contributed equally to this work.

arisaw@phs.osaka-u.ac.jp

## X-ray structure analysis

A brown block crystal of 2a (C<sub>20</sub>H<sub>29</sub>O<sub>2</sub>Si) having approximate dimensions of 0.344 x 0.293 x 0.259 mm was mounted on a glass fiber. All measurements were made on a Rigaku R-Axis RAPID diffractometer using graphite monochromated Cu-K $\alpha$  radiation.

The crystal-to-detector distance was 127.40 mm.

Cell constants and an orientation matrix for data collection corresponded to a primitive monoclinic cell with dimensions:

$$\begin{aligned} a &= 10.5104(3) \text{ \AA} \\ b &= 11.3774(3) \text{ \AA} & \beta &= 93.828(7)^\circ \\ c &= 32.0579(9) \text{ \AA} \\ V &= 3824.95(18) \text{ \AA}^3 \end{aligned}$$

For  $Z = 10$  and F.W. = 330.54, the calculated density is 1.435 g/cm<sup>3</sup>. The reflection conditions of:

$$\begin{aligned} h0l: & l = 2n \\ 0k0: & k = 2n \end{aligned}$$

uniquely determine the space group to be:

$$P2_1/c$$

Of the 39,424 reflections were collected, where 6995 were unique ( $R_{\text{int}} = 0.1223$ ); equivalent reflections were merged.

The linear absorption coefficient,  $\mu$ , for Cu-K $\alpha$  radiation is 14.118 cm<sup>-1</sup>. An empirical absorption correction was applied which resulted in transmission factors ranging from 0.365 to 0.694. The data were corrected for Lorentz and polarization effects. A correction for secondary extinction<sup>1</sup> was applied (coefficient = -11.761000).

The structure was solved by direct methods<sup>2</sup> and expanded using Fourier techniques. The non-hydrogen atoms were refined anisotropically. Hydrogen atoms were refined using the riding model. The final cycle of full-matrix least-squares refinement<sup>3</sup> on  $F$  was based on 6,995 observed reflections ( $I > 0.00\sigma(I)$ ) and 479 variable parameters and converged (largest parameter shift was 0.09 times its esd) with unweighted and weighted agreement factors of:

$$R = \sum ||F_o| - |F_c|| / \sum |F_o| = 0.0723$$

$$R_w = [\sum w (|F_o| - |F_c|)^2 / \sum w F_o^2]^{1/2} = 0.0919$$

The goodness of fit<sup>4</sup> was 1.86. The weighting scheme was based on counting statistics. Plots of  $\sum w (|F_o| - |F_c|)^2$  versus  $|F_o|$ , reflection order in data collection,  $\sin \theta/\lambda$  and various classes of indices showed no unusual trends. The maximum and minimum peaks on the final difference Fourier map corresponded to 0.71 and -0.60  $e^{-1}\text{\AA}^3$ , respectively.

Neutral atom scattering factors were taken from International Tables for X-ray Crystallography (IT), Vol. IV, Table 2.2B<sup>5</sup>. Anomalous dispersion effects were included in  $F_{calc}$ <sup>6</sup>; the values for  $\Delta f'$  and  $\Delta f''$  were those of Creagh and McAuley<sup>7</sup>. The values for the mass attenuation coefficients are those of Creagh and Hubbell<sup>8</sup>. All calculations were performed using the CrystalStructure<sup>9,10</sup> crystallographic software package.

### *References*

(1) Larson, A.C. (1970), *Crystallographic Computing*, 291-294. F.R. Ahmed, ed. Munksgaard, Copenhagen (equation 22, with V replaced by the cell volume).

(2) SIR92: Altomare, A., Cascarano, G., Giacovazzo, C. and Guagliardi, A. (1993). *J. Appl. Cryst.* 26, 343-350.

(3) Least Squares function minimized:

$$\sum w (|F_o| - |F_c|)^2 \quad \text{where } w = \text{Least Squares weights.}$$

(4) Goodness of fit is defined as:

$$[\sum w (|F_o| - |F_c|)^2 / (N_o - N_v)]^{1/2}$$

where:  $N_o$  = number of observations  
 $N_v$  = number of variables

(5) *International Tables for X-ray Crystallography*, Vol. IV (1974). Ed. J.A. Ibers and W.C. Hamilton, The Kynoch Press, Birmingham, England, Table 2.2B, pp. 99.

(6) Ibers, J. A. & Hamilton, W. C.; *Acta Crystallogr.*, 17, 781 (1964).

(7) Creagh, D. C. & McAuley, W.J. ; "International Tables for Crystallography", Vol C, (A.J.C. Wilson, ed.), Kluwer Academic Publishers, Boston, Table 4.2.6.8, pages 219-222 (1992).

(8) Creagh, D. C. & Hubbell, J.H.; "International Tables for Crystallography", Vol C, (A.J.C. Wilson, ed.), Kluwer Academic Publishers, Boston, Table 4.2.4.3, pages 200-206 (1992).

(9) CrystalStructure 4.2.5: Crystal Structure Analysis Package, Rigaku Corporation (2000-2017). Tokyo 196-8666, Japan.

(10) CRYSTALS Issue 11: Carruthers, J.R., Rollett, J.S., Betteridge, P.W., Kinna, D., Pearce, L., Larsen, A., and Gabe, E. Chemical Crystallography Laboratory, Oxford, UK. (1999)
